# Supplementary material
Source: Royal Society of Chemistry journal article supplement (doi:10.1039/d6cp00993j)
Supplement: d6cp00993j1.pdf [file d6cp00993j1.pdf]

## Supporting Information

### From CAT-like to POD-like Enzymatic Activity of Cu-BHT

#### Tuning by Substrate Engineering

Ting Wang<sup>1,2</sup>, Liyuan Wang<sup>1</sup>, Hongsheng Liu<sup>\*1</sup>, Zhongran Wei<sup>\*2</sup>, Vitaly Ksenevich<sup>3</sup>, Juan Hou<sup>2</sup>, Junfeng Gao<sup>1\*</sup>.

1. Key Laboratory of Materials Modification by Laser, Ion and Electron Beams (Dalian University of Technology), Ministry of Education, School of Physics, Dalian 116024, China
2. College of Sciences/State Key Laboratory of Advanced Energy Storage Materials and Technology, Shihezi University, Xinjiang, Shihezi, 832003, China.
3. Faculty of Physics, Belarusian State University, Nezalezhnasti av.4, Minsk 220030, Belarus

S1 AIMD energy evolution for Cu-BHT.

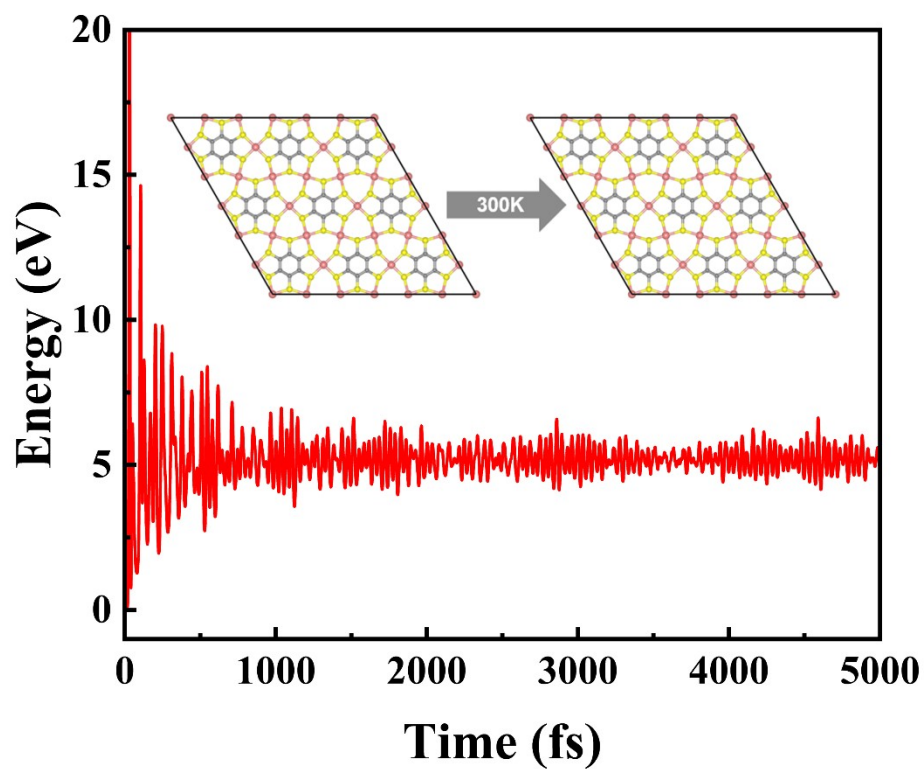

**Figure S1.** AIMD results for Cu-BHT in the NVT ensemble at 300 K, demonstrating stable energy/structure evolution.

S2 Top view of the optimized geometries of the H atoms adsorbed on the surface of Cu-BHT.

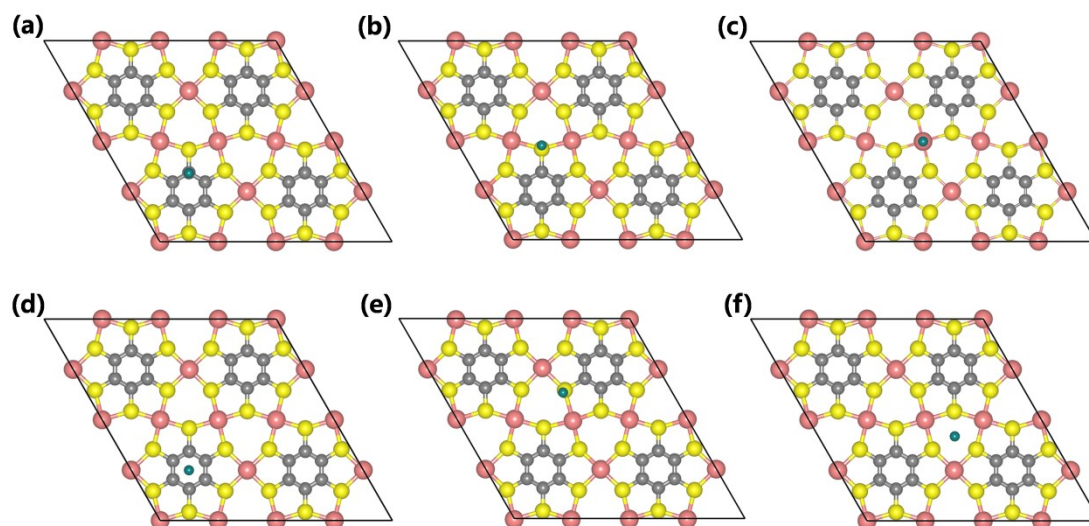

**Figure S2.** Top view of the optimized geometries of the H atoms adsorbed on the surface of Cu-BHT. The H atom adsorbed in the ‘C top’ (a), ‘S top’ (b), ‘Cu top’ (c), ‘top of the center of the benzene ring’ (d), “top of the ‘CuC<sub>2</sub>S<sub>2</sub> ring’” (e) and “top of the center of ‘S<sub>3</sub>Cu<sub>3</sub> ring’” (f).

S3 Top view of the optimized geometries of the OH atoms adsorbed on

the surface of Cu-BHT.

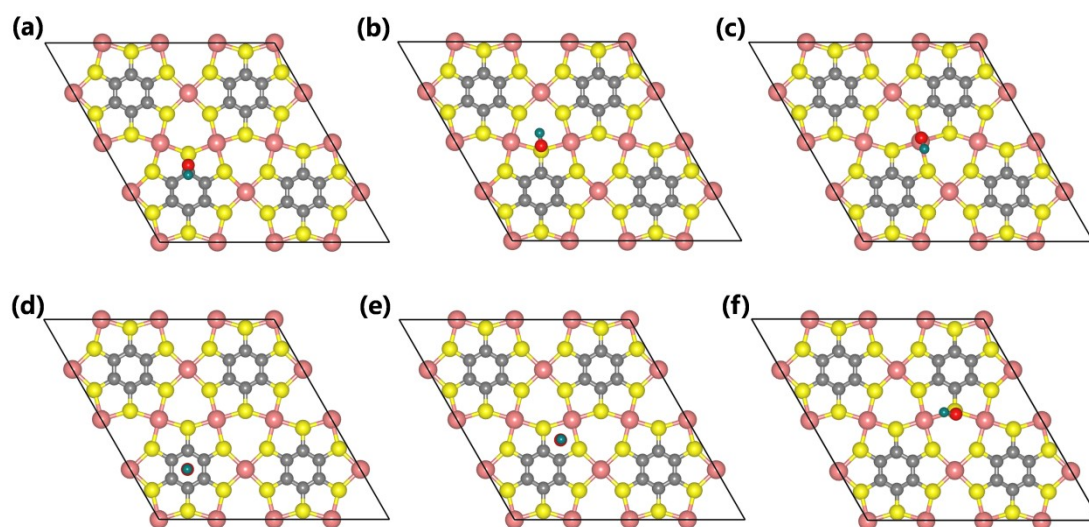

**Figure S3.** Top view of the optimized geometries of the OH atoms adsorbed on the surface of Cu-BHT. The OH atom adsorbed in the ‘C top’ (a), ‘S top’ (b), ‘Cu top’ (c), ‘top of the center of the benzene ring’ (d), “top of the ‘CuC<sub>2</sub>S<sub>2</sub> ring’” (e) and “top of the center of ‘S<sub>3</sub>Cu<sub>3</sub> ring’” (f).

S4 Top view of the optimized geometries of the H<sub>2</sub>O<sub>2</sub> atoms adsorbed on

the surface of Cu-BHT.

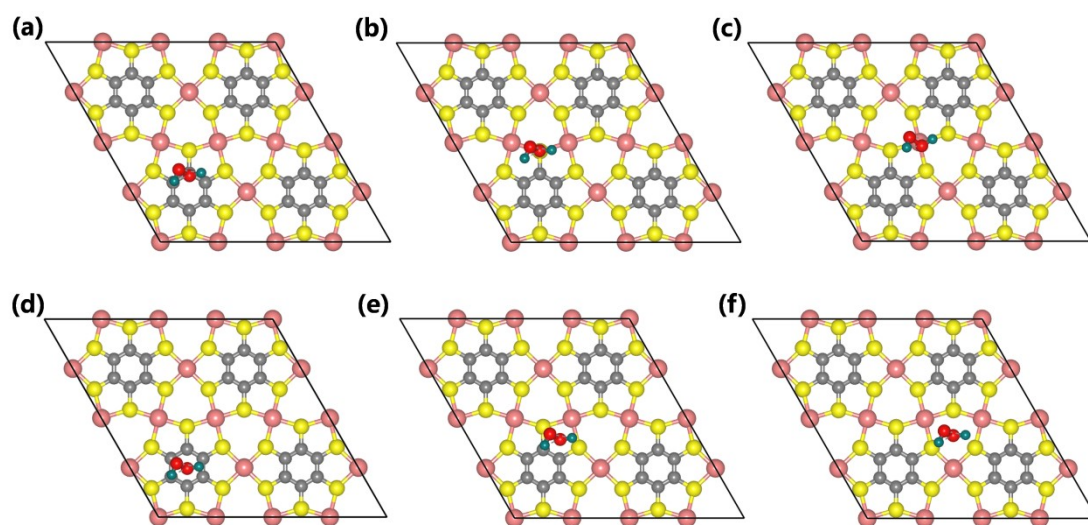

**Figure S4.** Top view of the optimized geometries of the  $\text{H}_2\text{O}_2$  atoms adsorbed on the surface of Cu-BHT. The  $\text{H}_2\text{O}_2$  atom adsorbed in the ‘C top’ (a), ‘S top’ (b), ‘Cu top’ (c), ‘top of the center of the benzene ring’ (d), “top of the ‘ $\text{CuC}_2\text{S}_2$  ring’” (e) and “top of the center of ‘ $\text{S}_3\text{Cu}_3$  ring’” (f).

Table S1 Adsorption energies  $\Delta E$  (eV) of different adsorbates O, OH, and  $H_2O_2$  on Cu-BHT. Red values indicate the most stable adsorption sites.

| Adsorbed Sites                        | H (eV)        | OH (eV)       | $H_2O_2$ (eV) |
|---------------------------------------|---------------|---------------|---------------|
| C top                                 | -0.334        | <b>-1.566</b> | -0.508        |
| S top                                 | -2.536        | -1.529        | -0.499        |
| Cu top                                | -1.307        | -0.903        | <b>-0.638</b> |
| top of the center of the benzene ring | -0.336        | 0.143         | -0.506        |
| top of the 'CuC2S2 ring'              | <b>-2.561</b> | -0.965        | -0.516        |
| top of the center of 'S3Cu3 ring'     | -0.336        | -1.559        | -0.521        |

Table S2 Adsorption energies  $\Delta E$  (eV) of different adsorbates O, OH, and  $H_2O_2$  on Cu-BHT/SiO<sub>2</sub>. Red values indicate the most stable adsorption sites.

| Adsorbed Sites                        | H (eV)        | OH (eV)       | $H_2O_2$ (eV) |
|---------------------------------------|---------------|---------------|---------------|
| C top                                 | 0.048         | -0.828        | -0.147        |
| S top                                 | -2.178        | -1.186        | -0.169        |
| Cu top                                | <b>-2.203</b> | -1.186        | <b>-0.418</b> |
| top of the center of the benzene ring | 0.047         | -1.126        | -0.128        |
| top of the 'CuC2S2 ring'              | -2.188        | <b>-2.312</b> | -0.192        |
| top of the center of 'S3Cu3 ring'     | -2.105        | -1.376        | -0.320        |

S5 Top view of the optimized geometries of the H atoms adsorbed on the surface of SiO<sub>2</sub>/Cu-BHT.

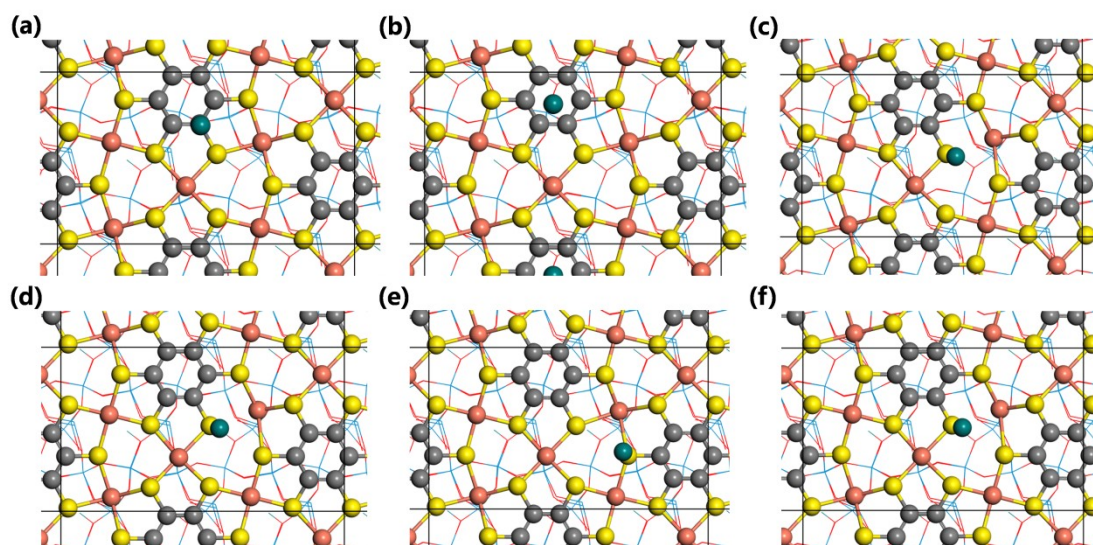

**Figure S5.** Top view of the optimized geometries of the H atoms adsorbed on the surface of SiO<sub>2</sub>/Cu-BHT. The H atom adsorbed in the ‘C top’ (a), ‘top of the center of the benzene ring’ (b), ‘Cu top’ (c), “top of the ‘CuC<sub>2</sub>S<sub>2</sub> ring’” (d), “top of the center of ‘S<sub>3</sub>Cu<sub>3</sub> ring’” (e) and ‘S top’(f).

S6 Top view of the optimized geometries of the OH atoms adsorbed on the surface of SiO<sub>2</sub>/Cu-BHT.

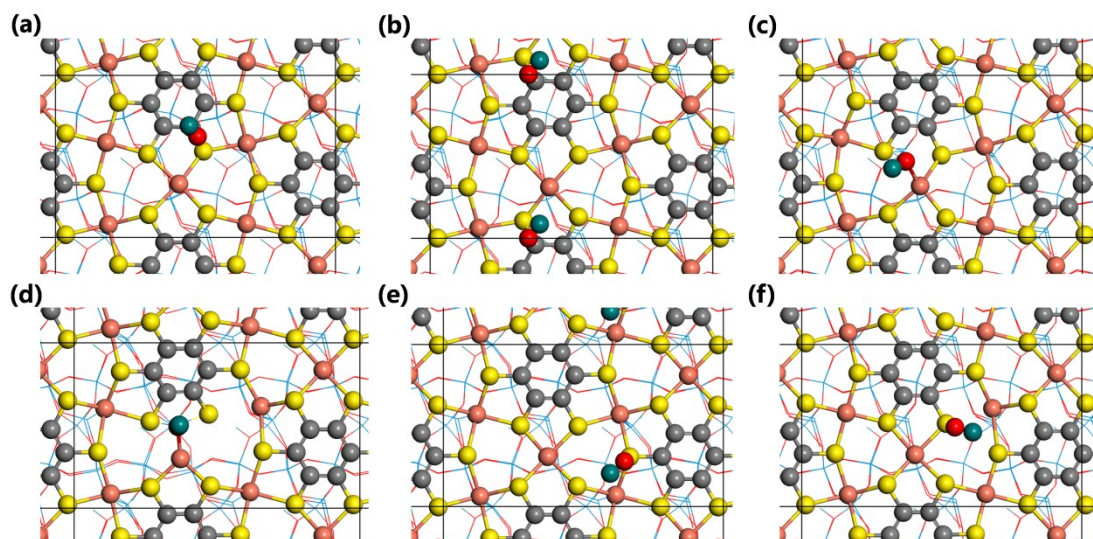

**Figure S6.** Top view of the optimized geometries of the OH atoms adsorbed on the surface of SiO<sub>2</sub>/Cu-BHT. The OH atom adsorbed in the ‘C top’ (a), ‘top of the center of the benzene ring’ (b), ‘Cu top’ (c), “top of the ‘CuC<sub>2</sub>S<sub>2</sub> ring’” (d), “top of the center of ‘S<sub>3</sub>Cu<sub>3</sub> ring’” (e) and ‘S top’ (f).

S7 Top view of the optimized geometries of the  $\text{H}_2\text{O}_2$  atoms adsorbed on the surface of  $\text{SiO}_2/\text{Cu-BHT}$ .

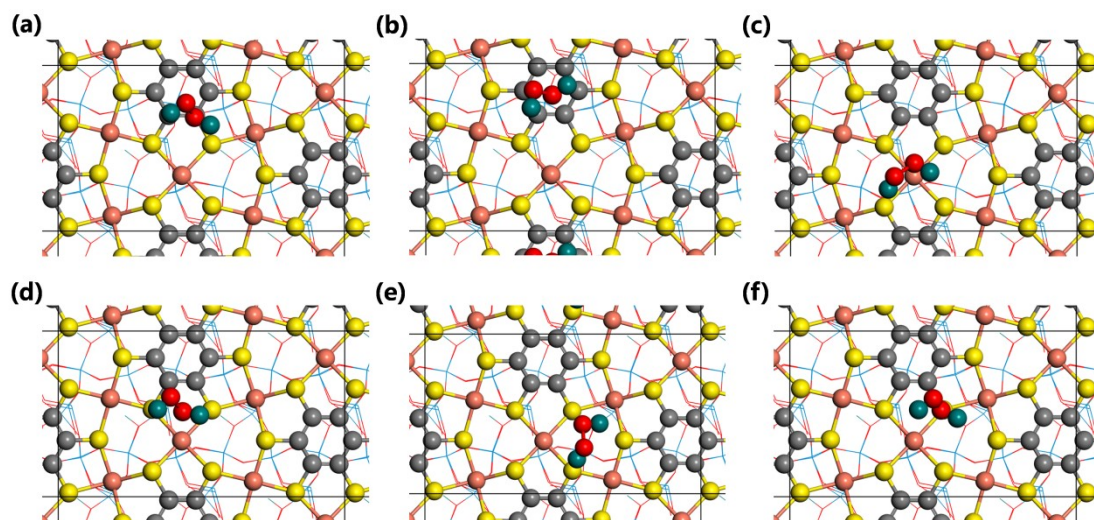

**Figure S7.** Top view of the optimized geometries of the  $\text{H}_2\text{O}_2$  atoms adsorbed on the surface of  $\text{SiO}_2/\text{Cu-BHT}$ . The  $\text{H}_2\text{O}_2$  atom adsorbed in the ‘C top’ (a), ‘top of the center of the benzene ring’ (b), ‘Cu top’ (c), “top of the ‘CuC2S2 ring’” (d), “top of the center of ‘S3Cu3 ring’” (e) and ‘S top’ (f).

Table S3 Bader charge variation and electron transfer direction.

| System                                                   | Site                                                 | $\Delta Q$ ( $e^-$ ) | Electron transfer direction                              |
|----------------------------------------------------------|------------------------------------------------------|----------------------|----------------------------------------------------------|
| SiO <sub>2</sub> /Cu-BHT                                 | Cu                                                   | +0.058               | SiO <sub>2</sub> → Cu-BHT                                |
| SiO <sub>2</sub> /Cu-BHT                                 | Interfacial Cu                                       | +0.174               | SiO <sub>2</sub> → interfacial Cu                        |
| SiO <sub>2</sub> /Cu-BHT + H <sub>2</sub> O <sub>2</sub> | O atoms in adsorbed<br>H <sub>2</sub> O <sub>2</sub> | +0.037               | SiO <sub>2</sub> /Cu-BHT → H <sub>2</sub> O <sub>2</sub> |

S8 Projected density of states (PDOS) of Cu\_3d orbitals in Cu-BHT and SiO<sub>2</sub>/Cu-BHT.

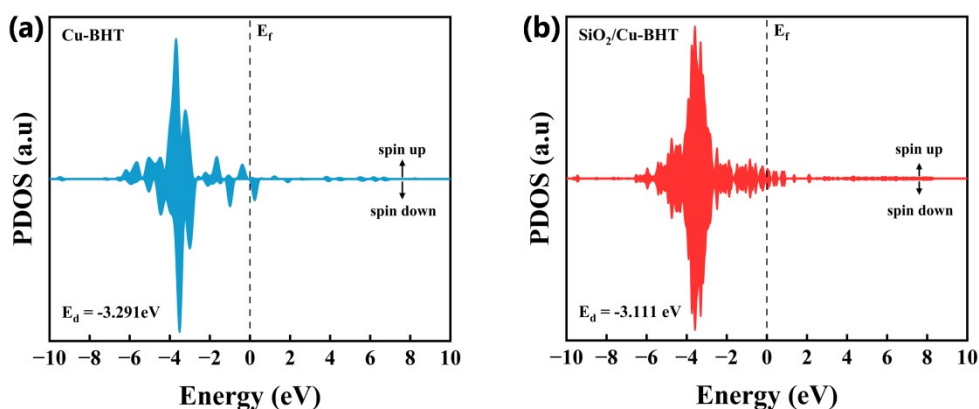

**Figure S8.** (a) PDOS of Cu\_3d orbitals in pristine Cu-BHT and (b) in the SiO<sub>2</sub>/Cu-BHT. The vertical dashed line at 0 eV marks the Fermi level. The d-band center values are given in the lower-left corner of each panel, which shift from -3.29 eV in (a) to -3.11 eV in (b). The upward shift of the d-band center upon SiO<sub>2</sub> integration indicates enhanced electron-donating ability of the Cu centers.
